# Supplementary material for: Salut: Una proposta per a la prevenció de les drogodependències
Source: MDPI journal article supplement (doi:10.3390/nano12213771), 1996-01-01
Supplement: s1 [file s1]

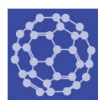

# Glucose Hydrogenolysis into 1,2-Propanediol Using a Pt/deAl@Mg(OH)<sub>2</sub> Catalyst: Expanding the Application of a Core–Shell Structured Catalyst

Shizhuo Wang, Jikang Jiang, Minyan Gu, Yuanbo Song, Jiang Zhao \*, Zheng Shen \*, Xuefei Zhou and Yalei Zhang

State Key Laboratory of Pollution Control and Resources Reuse, Key Laboratory of Yangtze River Water Environment of MOE, College of Environmental Science and Engineering, Tongji University, Shanghai 200092, China

\* Correspondence: jiangzhao@tongji.edu.cn (J.Z.); shenzheng@tongji.edu.cn (Z.S.); Tel.: 86-21-6598-5811

## The supplementary Figures and Tables

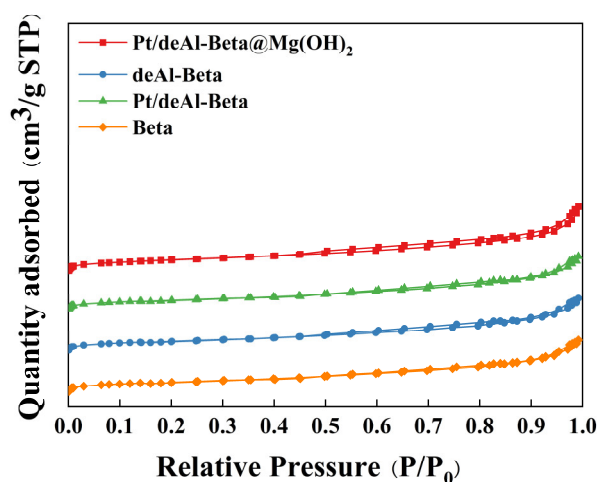

Figure S1. The Nitrogen adsorption-desorption isotherms of different catalysts.

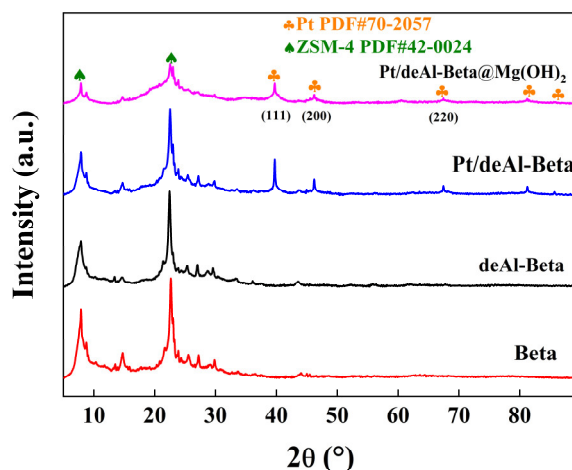

Figure S2. The XRD patterns of catalysts.

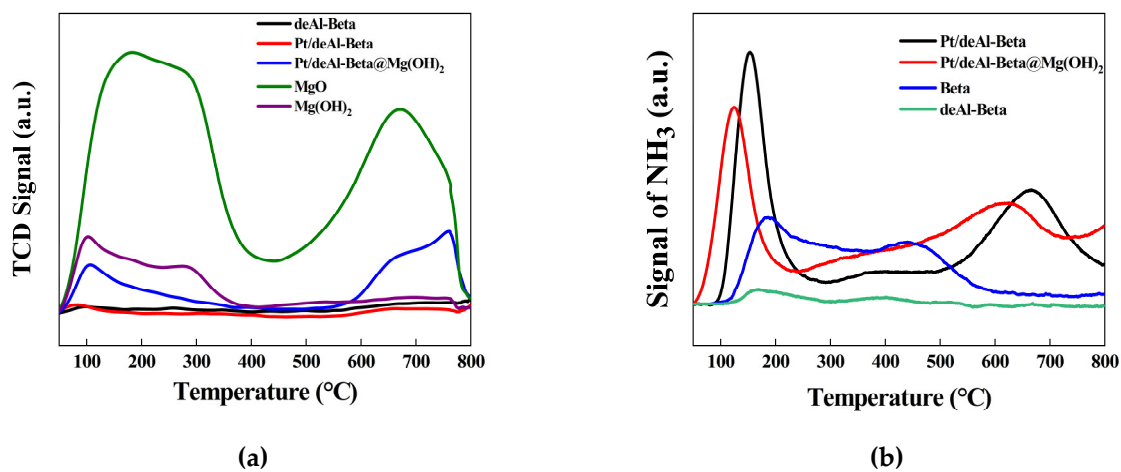

**Figure S3.** The results of the acid-base analysis. (a) CO<sub>2</sub>-TPD results for different catalysts; (b) NH<sub>3</sub>-TPD results for different catalysts.

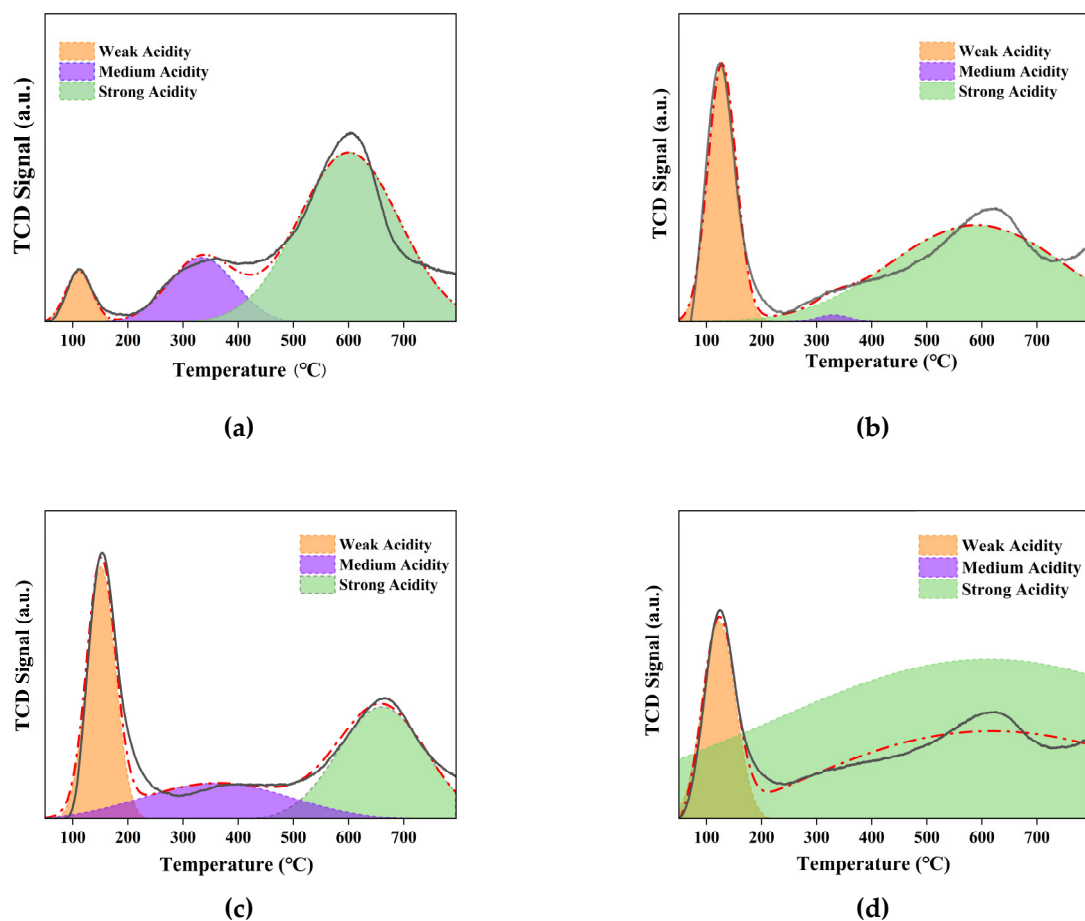

**Figure S4.** The results of the acid-base analysis. (a) CO<sub>2</sub>-TPD results for Pt/deAl catalyst; (b) CO<sub>2</sub>-TPD results for Pt/deAl@Mg(OH)<sub>2</sub> catalyst; (c) NH<sub>3</sub>-TPD results for Pt/deAl catalyst; (d) NH<sub>3</sub>-TPD results for Pt/deAl@Mg(OH)<sub>2</sub> catalyst.

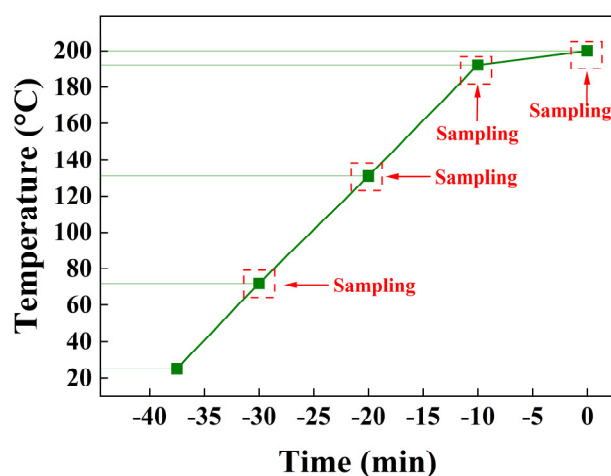

Figure S5. The temperature changes in the heating process before time 0.

Table S1. The pore properties of prepared catalysts.

| Catalyst                           | Surface Area<br>m <sup>2</sup> /g | Pore Volume<br>cm <sup>3</sup> /g | Pore Size<br>nm |
|------------------------------------|-----------------------------------|-----------------------------------|-----------------|
| Beta                               | 428.19                            | 0.36                              | 3.40            |
| deAl-Beta                          | 411.69                            | 0.37                              | 3.64            |
| Pt/deAl-Beta                       | 301.75                            | 0.33                              | 4.42            |
| Pt/deAl-Beta@Mg(OH) <sub>2</sub> * | 230.45                            | 0.26                              | 4.54            |

\*The loading of Mg(OH)<sub>2</sub> is 7.5 wt%.

Table S2. The reaction performance of intermediate products over Pt/deAl-Beta and Pt/deAl-Beta@Mg(OH)<sub>2</sub>.

| Catalyst                          | Reactant | Conv.<br>(%) | Selectivity(%) |     |        |          |          |         |
|-----------------------------------|----------|--------------|----------------|-----|--------|----------|----------|---------|
|                                   |          |              | 1,2-PDO        | EG* | Acetol | 1,2-BDO* | 1,2-HDO* | hexitol |
| Pt/deAl-Beta                      | glucose  | 100          | 4.3            | 0.8 | 21.2   | 7.7      | 3.8      | 6.8     |
| Pt/deAl-Beta @Mg(OH) <sub>2</sub> | glucose  | 100          | 34.1           | 8.5 | 0      | 4.3      | 2.5      | 3.1     |
| Pt/deAl-Beta                      | fructose | 100          | 35.4           | 6.2 | 5.9    | 3.6      | 5.2      | 2.8     |
| Pt/deAl-Beta @Mg(OH) <sub>2</sub> | fructose | 100          | 38.6           | 4.8 | 0      | 1.9      | 3.3      | 5.3     |
| Pt/deAl-Beta                      | sorbitol | 2.7          | 0              | 0   | 0      | 0        | 81.7     | -       |
| Pt/deAl-Beta @Mg(OH) <sub>2</sub> | sorbitol | 3.3          | 58.6           | 0   | 0      | 0        | 0        | -       |
| Pt/deAl-Beta                      | mannitol | 18.2         | 0              | 0   | 0      | 0        | 85.3     | -       |
| Pt/deAl-Beta @Mg(OH) <sub>2</sub> | mannitol | 39.1         | 68.7           | 0   | 0      | 0        | 6.7      | -       |
| Pt/deAl-Beta                      | 1,2-HDO  | 7.6          | 0              | 0   | 0      | 0        | -        | -       |
| Pt/deAl-Beta @Mg(OH) <sub>2</sub> | 1,2-HDO  | 9.7          | 0              | 0   | 0      | 0        | -        | -       |
| Pt/deAl-Beta                      | DHA*     | 92.5         | 94.8           | 0   | 9.6    | -        | -        | -       |
| Pt/deAl-Beta @Mg(OH) <sub>2</sub> | DHA      | 86.3         | 54.3           | 0   | 12.7   | -        | -        | -       |
| Pt/deAl-Beta                      | Acetol   | 90.2         | 81.3           | 0   | -      | -        | -        | -       |
| Pt/deAl-Beta @Mg(OH) <sub>2</sub> | Acetol   | 96.2         | 88.8           | 0   | -      | -        | -        | -       |

\*1,2-PDO=1,2-propanediol; EG=ethylene glycol;  
1,2-HDO=1,2-hexanediol; 1,2-BDO=1,2-butanediol; DHA=dihydroxyacetone.

Table S3. Application of Pt loading in beta zeolite.

| Catalyst     | Pt loading(wt%) | Enhancing effect                                              | References |
|--------------|-----------------|---------------------------------------------------------------|------------|
| Pt/H-Beta    | 0.5             | guaiacol conversion larger than 90%                           | [1]        |
| Pt/K-Beta-HS | 1               | longer lifetime(205 h), higher selectivity to aromatics (80%) | [2]        |
| Pt/Beta      | 1               | 80% hydrogenation activity                                    | [3]        |

---

|                           |      |                                                                                    |     |
|---------------------------|------|------------------------------------------------------------------------------------|-----|
| Ni <sub>2</sub> Pt/H-Beta | 0.10 | conversion of n-heptane is 55.9%, selectivity of isomerization is 91.5%            | [4] |
| Pt/ZF-D                   | 0.5  | the highest catalytic performance of toluene combustion (T <sub>90</sub> = 158 °C) | [5] |

---

## References

1. Kim; Hannah; Jeon; Jong-Ki; Sang; Chai; Park; Sung; Hoon; Young-Kwon. Hydrodeoxygenation of guaiacol over Pt loaded zeolitic materials. *Journal of industrial and engineering chemistry* **2016**, *37*, 18-21.
2. B, Y.S.A.; B, Q.Z.A.; A, Z.Q.; A, Z.W.; A, W.J.; A, M.D.; A, W.F.; B, J.W.A. Hierarchically structured Pt/K-Beta zeolites for the catalytic conversion of n -heptane to aromatics. *Microporous and Mesoporous Materials* **2021**, *324*.
3. Monteiro, C.A.A.; Costa, D.; Zotin, J.L.; Cardoso, D. Effect of metal–acid site balance on hydroconversion of decalin over Pt/Beta zeolite bifunctional catalysts. *Fuel* **2015**, *160*, 71-79.
4. Yao, Y.; Tian, Y.-J.; Wu, H.-H.; Lu, S.-X. Pt-promoted and H $\beta$  zeolite-supported Ni<sub>2</sub>P catalysts for hydroisomerisation of n-heptane. *Fuel Processing Technology* **2015**, *133*.
5. Zou, S.; Zhang, M.; Mo, S.; Cheng, H.; Fu, M.; Chen, P.; Chen, L.; Shi, W.; Ye, D. Catalytic Performance of Toluene Combustion over Pt Nanoparticles Supported on Pore-Modified Macro-Meso-Microporous Zeolite Foam. *Nanomaterials (Basel)* **2019**, *10*.
